# Supplementary material for: Predicting Meridian in Chinese traditional medicine using machine learning approaches
Source: PLoS Comput Biol. 2019 Nov 25;15(11):e1007249. doi: 10.1371/journal.pcbi.1007249 (PMC6876772; doi:10.1371/journal.pcbi.1007249)
Supplement: S5 Table — (XLSX) [file pcbi.1007249.s009.xlsx]

## Sheet: TableS1
Table S5. The 36 ADME properties based on the chemical structure of compounds.
ADME properties	Abbreviation	Description	Detail
Physicochemical Properties	MW	Molecular weight	Molecular weight is a measure of the sum of the atomic weight values of the atoms in a molecule.
Physicochemical Properties	Heavy atoms	Number of heavy atoms	An atom is the smallest constituent unit of ordinary matter that has the properties of a chemical element. The number of heavy atoms is the number of Non-Hydrogen atoms in a given molecule.
Physicochemical Properties	Aromatic heavy atoms	Number of Aromatic heavy atoms	The number of aromatic heavy atoms is the number of aromatic Non-Hydrogen atoms in a given molecule in a planar unsaturated ring of atoms.Unsaturated ring is stabilized by an interaction of the bonds forming the ring, e.g. benzene and its derivatives.
Physicochemical Properties	Fraction Csp3	the fraction of carbon bond saturation	The fraction of carbon bond saturation
Physicochemical Properties	Rotatable bonds	Number of Rotatable bonds	Rotatable bonds were defined as any single bond, not in a ring, bound to a nonterminal heavy (i.e., non-hydrogen) atom. This value can reflect molecular flexibility
Physicochemical Properties	H-bond acceptors	Number of H-bond acceptors	The hydrogen acceptor is the neighboring electronegative ion or molecule, and must posses a lone electron pair in order to form a hydrogen bond.
Physicochemical Properties	H-bond donors	Number of H-bond donors	The donor in a hydrogen bond is the atom to which the hydrogen atom participating in the hydrogen bond is covalently bonded, and is usually a strongly electronegative atom such as N,O, or F.
Physicochemical Properties	MR	molecular refractivity (MR)	A measure of the total polarizability of a mole of a substance and is dependent on the temperature, the index of refraction, and the pressure.
Physicochemical Properties	TPSA	topological polar surface area	Thesurface sum over all polar atoms or molecules, primarily oxygen and nitrogen, also including their attached hydrogen atoms.
Lipophilicity	iLOGP	Lipophilicity prediction result from iLOGP prediction model	Lipophilicity, refers to the ability of a chemical compound to dissolve in fats, oils, lipids, and non-polar solvents such as hexane or toluene. A partition coefficient (P) or distribution coefficient (D) is the ratio of concentrations of a compound in a mixture of two immiscible phases at equilibrium. This ratio is therefore a measure of the difference in solubility of the compound in these two …
Lipophilicity	XLOGP3	Lipophilicity prediction result from XLOGP3 prediction model	Lipophilicity, refers to the ability of a chemical compound to dissolve in fats, oils, lipids, and non-polar solvents such as hexane or toluene. A partition coefficient (P) or distribution coefficient (D) is the ratio of concentrations of a compound in a mixture of two immiscible phases at equilibrium. This ratio is therefore a measure of the difference in solubility of the compound in these two …
Lipophilicity	WLOGP	Lipophilicity prediction result from WLOGP prediction model	Lipophilicity, refers to the ability of a chemical compound to dissolve in fats, oils, lipids, and non-polar solvents such as hexane or toluene. A partition coefficient (P) or distribution coefficient (D) is the ratio of concentrations of a compound in a mixture of two immiscible phases at equilibrium. This ratio is therefore a measure of the difference in solubility of the compound in these two …
Lipophilicity	MLOGP	Lipophilicity prediction result from MLOGP prediction model	Lipophilicity, refers to the ability of a chemical compound to dissolve in fats, oils, lipids, and non-polar solvents such as hexane or toluene. MLOGP:an archetype of topological method relying on a linear relationship with 13 molecular descriptors implemented f from Moriguchi I. et al. 1992 Chem. Pharm. Bull. Moriguchi I. et al. 1994 Chem. Pharm. Bull. Lipinski PA. et al. 2001 Adv. Drug. Deliv. …
Lipophilicity	Silicos-IT LogP	Lipophilicity prediction result from Silicos-IT LogP prediction model	Lipophilicity, refers to the ability of a chemical compound to dissolve in fats, oils, lipids, and non-polar solvents such as hexane or toluene. A partition coefficient (P) or distribution coefficient (D) is the ratio of concentrations of a compound in a mixture of two immiscible phases at equilibrium. This ratio is therefore a measure of the difference in solubility of the compound in these two …
Water Solubility	ESOL LogS	Water Solubility by log S from model ESOL	Water solubility is a measure of the amount of chemical substance that can dissolve in water at a specific temperature. There ra ethree Measurement Unita. logS: sets the measurement unit to logS (default). mol/l: sets the measurement unit to mol/l. mg/ml: sets the measurement unit to mg/ml. ESOL: Topological method implemented from Delaney JS. 2004 J. Chem. Inf. Model.
Water Solubility	Ali LogS	Water Solubility by log S from model Ali	Water solubility is a measure of the amount of chemical substance that can dissolve in water at a specific temperature. There ra ethree Measurement Unita. logS: sets the measurement unit to logS (default). mol/l: sets the measurement unit to mol/l. mg/ml: sets the measurement unit to mg/ml. Ali: Topological method implemented from Ali J. et al. 2012 J. Chem. Inf. Model.
Water Solubility	Silicos-IT LogSw	Water Solubility by log S from Silicos model	Water solubility is a measure of the amount of chemical substance that can dissolve in water at a specific temperature. There ra ethree Measurement Unita. logS: sets the measurement unit to logS (default). mol/l: sets the measurement unit to mol/l. mg/ml: sets the measurement unit to mg/ml. SILICOS-IT: Fragmental method calculated by FILTER-IT program, version 1.0.2, courtesy of SILICOS-IT, http:…
Pharmacokinetics	GI absorption	Whether the molecular is passive Gatrointestinal absorption or not.	Gatrointestinal absorption: according to the white of the BOILED-Egg
Pharmacokinetics	BBB permeant	Whether the molecular can go through blood–brain barrier or not.	BBB permeation: according to the yolk of the BOILED-Egg
Pharmacokinetics	P-gp substrate	Whether the molecular is P-glycoprotein substrate	P-glycoprotein substrate: SVM model built on 1033 molecules (training set) and tested on 415 molecules (test set) 10-fold CV: ACC=0.72 / AUC=0.77 External: ACC=0.88 / AUC=0.94
Pharmacokinetics	CYP1A2 inhibitor	Whether the molecular is Cytochrome P450 1A2 inhibitor	Cytochrome P450 1A2 inhibitor: SVM model built on 9145 molecules (training set) and tested on 3000 molecules (test set) 10-fold CV: ACC=0.83 / AUC=0.90 External: ACC=0.84 / AUC=0.91
Pharmacokinetics	CYP2C19 inhibitor	Whether the molecular is Cytochrome P450 2C19 inhibitor	Cytochrome P450 2C19 inhibitor: SVM model built on 9272 molecules (training set) and tested on 3000 molecules (test set) 10-fold CV: ACC=0.80 / AUC=0.86 External: ACC=0.80 / AUC=0.87
Pharmacokinetics	CYP2C9 inhibitor	Whether the molecular is Cytochrome P450 2C9 inhibitor	Cytochrome P450 2C9 inhibitor: SVM model built on 5940 molecules (training set) and tested on 2075 molecules (test set) 10-fold CV: ACC=0.78 / AUC=0.85 External: ACC=0.71 / AUC=0.81
Pharmacokinetics	CYP2D6 inhibitor	Whether the molecular is Cytochrome P450 2D6 inhibitor	Cytochrome P450 2D6 inhibitor: SVM model built on 3664 molecules (training set) and tested on 1068 molecules (test set) 10-fold CV: ACC=0.79 / AUC=0.85 External: ACC=0.81 / AUC=0.87
Pharmacokinetics	CYP3A4 inhibitor	Whether the molecular is Cytochrome CYP3A4 inhibitor	Cytochrome P450 3A4 inhibitor: SVM model built on 7518 molecules (training set) and tested on 2579 molecules (test set) 10-fold CV: ACC=0.77 / AUC=0.85 External: ACC=0.78 / AUC=0.86
Pharmacokinetics	logKp (cm/s)	permeability coefficient (Kp)	This prediction of permeability coefficient (Kp) for the transport of compounds through mammalian epidermisis is based on the linear model by Potts RO. and Guy RH. (1992). . For example, Diclofenac is a good topic anti-inflammatory with a predicted log Kp = -4.96 (cm/s) and on the contrary Ouabain has little chance to cross skin with a predicted log Kp = -10.94 (cm/s).Skin permeation: QSPR model …
Druglikeness	Lipinski violations	How many violations of the molecular for Lipinski's rule.	Lipinski's rule of five also known as the Pfizer's rule of five or simply the rule of five (RO5) is a rule of thumb to evaluate druglikeness or determine if a chemical compound with a certain pharmacological or biological activity has chemical properties and physical properties that would make it a likely orally active drug in humans. Lipinski (Pfizer) filter: implemented from Lipinski CA. et al.…
Druglikeness	Ghose violations	How many violations of the molecular for Ghose filter	Ghose filter: implemented from Ghose AK. et al. 1999 J. Comb. Chem. 160 ≤ MW ≤ 480, 40 ≤ MR ≤ 130, 20 ≤ atoms ≤ 70, -0.4 ≤WLOGP ≤ 5.6
Druglikeness	Veber violations	How many violations of the molecular for Veber (GSK) filter	Veber (GSK) filter: implemented from Veber DF. et al. 2002 J. Med. Chem. Rotatable bonds ≤ 10 TPSA ≤ 140
Druglikeness	Egan violations	How many violations of the molecular for Egan (Pharmacia) filter	Egan (Pharmacia) filter: implemented from Egan WJ. et al. 2000 J. Med. Chem. WLOGP ≤ 5.88, TPSA ≤ 131.6
Druglikeness	Muegge violations	How many violations of the molecular for Muegge (Bayer) filter	Muegge (Bayer) filter: implemented from Muegge I. et al. 2001 J. Med. Chem. 200 ≤ MW ≤ 600 -2 ≤ XLOGP ≤ 5 TPSA ≤ 150 Num. rings ≤ 7 Num. carbon > 4 Num. heteroatoms > 1 Num. rotatable bonds ≤ 15, H-bond acc. ≤ 10, H-bond don. ≤ 5
Druglikeness	Bioavailability Score	permeability and bioavailability (F) properties	Abbott Bioavailability Score: Probability of F > 10% in rat implemented from Martin YC. 2005 J. Med. Chem.
Medicinal Chemistry	PAINS alerts	Whether the molecular is Pan-assay interference compounds or not.	Pan-assay interference compounds (PAINS) are chemical compounds that often give false positive results in high-throughput screens. PAINS tend to react nonspecifically with numerous biological targets rather than specifically affecting one desired target. A number of disruptive functional groups are shared by many PAINS. Pan Assay Interference Structures: implemented from Baell JB. & Holloway GA. …
Medicinal Chemistry	Brenk alerts	How many alerts of Brenk alerts in the molecular	The Structural Alert returned by Brenk is purely knowledge-based with a compilation of chemical moities known to be toxic, unstable, dye and so on. Structural Alert: implemented from Brenk R. et al. 2008 ChemMedChem
Medicinal Chemistry	Leadlikeness violations	How many violations of the molecular for Leadlikeness	Druglikeness is a qualitative concept used in drug design for how "druglike" a substance is with respect to factors like bioavailability. It is estimated from the molecular structure before the substance is even synthesized and tested. Leadlikeness: implemented from Teague SJ. 1999 Angew. Chem. Int. Ed. 250 ≤ MW ≤ 350 XLOGP ≤ 3.5 Num. rotatable bonds ≤ 7
Medicinal Chemistry	Synthetic Accessibility	Synthetic accessibility value is a score based on the fragmental analysis.	Synthetic accessibility value is a score based on the fragmental analysis of the structures of more than 13 milion compounds immediatly shippable by vendors with the assumption that the more a molecular fragment is frequent, the easier the molecule is to make. This fragmental contribution method is corrected by descriptors for molecular size and complexity. Finally the score is normalized between…
